# Supplementary material
Source: PubMed Central journal article supplement (PMC3017237)
Supplement: NIHMS232454-supplement-01.pdf [file NIHMS232454-supplement-01.pdf]

Table 2. Peripapillary Retinal Nerve Fiber Layer Thickness ( $\mu\text{m}$ ) of Normal and Glaucoma Subjects

| Parameter         | Normals        | Glaucoma      |               |               |               | p      | p <sup>1</sup> | p <sup>2</sup> | p <sup>3</sup> |
|-------------------|----------------|---------------|---------------|---------------|---------------|--------|----------------|----------------|----------------|
|                   |                | All           | Mild          | Moderate      | Severe        |        |                |                |                |
| 360° average      | 90.21 ± 9.13   | 63.18 ± 11.98 | 70.21 ± 12.72 | 60.91 ± 6.80  | 56.53 ± 8.67  | <0.001 | <0.001         | 0.015          | 0.50           |
| Temporal quadrant | 63.73 ± 11.06  | 50.24 ± 11.98 | 52.17 ± 12.53 | 47.72 ± 8.78  | 49.35 ± 12.76 | <0.001 | <0.001         | 0.62           | 0.97           |
| Superior quadrant | 114.11 ± 15.04 | 76.22 ± 18.77 | 87.88 ± 18.82 | 76.54 ± 13.72 | 63.16 ± 11.08 | <0.001 | <0.001         | 0.09           | 0.037          |
| Nasal quadrant    | 65.74 ± 9.85   | 57.09 ± 9.21  | 58.16 ± 8.80  | 57.66 ± 9.41  | 55.62 ± 9.69  | <0.001 | 0.001          | 0.99           | 0.92           |
| Inferior quadrant | 117.24 ± 15.80 | 69.16 ± 20.20 | 82.62 ± 21.57 | 61.70 ± 12.18 | 57.98 ± 12.02 | <0.001 | <0.001         | <0.01          | 0.89           |
| Clock-hr 9R/3L    | 50.09 ± 9.39   | 49.76 ± 10.24 | 48.00 ± 10.50 | 50.43 ± 8.76  | 51.36 ± 10.66 | 0.81   | 0.70           | 0.87           | 0.99           |
| Clock-hr 10R/2L   | 75.31 ± 14.62  | 59.03 ± 13.82 | 62.39 ± 15.50 | 59.06 ± 10.88 | 55.28 ± 12.58 | <0.001 | <0.001         | 0.89           | 0.85           |
| Clock-hr 11R/1L   | 124.34 ± 21.43 | 75.03 ± 24.17 | 86.53 ± 26.38 | 74.54 ± 24.14 | 62.54 ± 13.80 | <0.001 | <0.001         | 0.31           | 0.33           |
| Clock-hr 12RL     | 115.06 ± 25.43 | 78.14 ± 22.62 | 89.33 ± 22.48 | 78.75 ± 23.00 | 65.45 ± 15.42 | <0.001 | <0.001         | 0.51           | 0.32           |
| Clock-hr 1R/11L   | 102.92 ± 21.15 | 75.50 ± 23.35 | 87.78 ± 23.77 | 76.33 ± 19.63 | 61.49 ± 16.23 | <0.001 | 0.002          | 0.33           | 0.14           |
| Clock-hr 2R/10L   | 81.80 ± 15.73  | 58.87 ± 15.49 | 65.12 ± 15.97 | 59.52 ± 15.80 | 51.62 ± 11.69 | <0.001 | <0.001         | 0.67           | 0.40           |
| Clock-hr 3R/9L    | 55.04 ± 8.65   | 49.45 ± 13.29 | 49.00 ± 11.03 | 47.75 ± 11.30 | 50.78 ± 16.46 | 0.001  | 0.02           | 0.98           | 0.81           |
| Clock-hr 4R/8L    | 63.70 ± 12.49  | 50.71 ± 16.14 | 53.27 ± 13.32 | 43.81 ± 14.35 | 51.31 ± 18.12 | <0.001 | 0.001          | 0.14           | 0.34           |
| Clock-hr 5R/7L    | 94.10 ± 19.42  | 65.23 ± 24.85 | 79.03 ± 29.62 | 57.14 ± 19.62 | 54.01 ± 10.19 | <0.001 | 0.001          | 0.005          | 0.97           |
| Clock-hr 6RL      | 129.57 ± 24.53 | 74.61 ± 26.28 | 92.78 ± 28.70 | 66.64 ± 13.42 | 59.59 ± 15.31 | <0.001 | <0.001         | 0.006          | 0.80           |
| Clock-hr 7R/5L    | 128.04 ± 22.69 | 67.63 ± 22.02 | 77.06 ± 25.91 | 61.32 ± 14.82 | 60.35 ± 16.26 | <0.001 | <0.001         | 0.12           | 0.999          |
| Clock-hr 8R/4L    | 62.47 ± 14.19  | 54.17 ± 10.54 | 53.20 ± 11.60 | 55.59 ± 11.93 | 54.53 ± 8.71  | <0.001 | 0.003          | 0.94           | 0.995          |

Values are expressed as mean ± SD

SD - Standard Deviation; p - p-value between normals and all glaucoma patients; p<sup>1</sup> - p-value between normals and mild glaucoma; p<sup>2</sup> - p-value between mild and moderate glaucoma; p<sup>3</sup> - p-value between moderate and severe glaucoma; L - Left Eye; R - Right Eye, LR - Both Eyes.
