# Supplementary material
Source: PubMed Central journal article supplement (PMC3017237)
Supplement: NIHMS232454-supplement-02.pdf [file NIHMS232454-supplement-02.pdf]

Table 3. Optic Nerve Head Topographic Parameters of Normal and Glaucoma Subjects

| Parameter                     | Normals       | Glaucoma      |               |               |               | p      | p <sup>1</sup> | p <sup>2</sup> | p <sup>3</sup> |
|-------------------------------|---------------|---------------|---------------|---------------|---------------|--------|----------------|----------------|----------------|
|                               |               | All           | Mild          | Moderate      | Severe        |        |                |                |                |
| Cup area (mm <sup>2</sup> )   | 0.57 ± 0.36   | 1.27 ± 0.54   | 1.02 ± 0.46   | 1.57 ± 0.64   | 1.41 ± 0.46   | <0.001 | <0.001         | <0.001         | 0.63           |
| Disc area (mm <sup>2</sup> )  | 1.83 ± 0.35   | 1.93 ± 0.46   | 1.83 ± 0.44   | 2.20 ± 0.54   | 1.91 ± 0.41   | 0.07   | 1.00           | 0.01           | 0.10           |
| CDR                           | 0.51 ± 0.16   | 0.77 ± 0.13   | 0.71 ± 0.16   | 0.81 ± 0.1    | 0.83 ± 0.07   | <0.001 | <0.001         | 0.14           | 0.97           |
| HCDR                          | 0.53 ± 0.19   | 0.78 ± 0.15   | 0.72 ± 0.17   | 0.81 ± 0.12   | 0.82 ± 0.11   | <0.001 | <0.001         | 0.44           | 0.99           |
| VCDR                          | 0.48 ± 0.15   | 0.77 ± 0.13   | 0.69 ± 0.15   | 0.81 ± 0.07   | 0.83 ± 0.06   | <0.001 | <0.001         | 0.045          | 0.96           |
| Rim area (mm <sup>2</sup> )   | 1.27 ± 0.21   | 0.66 ± 0.25   | 0.81 ± 0.27   | 0.64 ± 0.17   | 0.51 ± 0.15   | <0.001 | <0.001         | 0.055          | 0.27           |
| HRT (μm)                      | 657.5 ± 257.4 | 298.3 ± 194.6 | 366.5 ± 24.9  | 268.6 ± 146.6 | 237.7 ± 140.5 | <0.001 | <0.001         | 0.57           | 0.98           |
| VRT (μm)                      | 800.4 ± 210.7 | 341.6 ± 181.8 | 458.1 ± 208.8 | 291.2 ± 103.5 | 237.9 ± 80.6  | <0.001 | <0.001         | 0.04           | 0.84           |
| Cup volume (mm <sup>3</sup> ) | 0.16 ± 0.14   | 0.58 ± 0.34   | 0.47 ± 0.30   | 0.74 ± 0.35   | 0.63 ± 0.34   | <0.001 | <0.001         | 0.001          | 0.37           |

Values are expressed as mean ± SD

SD - Standard Deviation; p - p-value between normals and all glaucoma patients; p<sup>1</sup> - p-value between normals and mild glaucoma; p<sup>2</sup> - p-value between mild and moderate glaucoma; p<sup>3</sup> - p-value between moderate and severe glaucoma; CDR - Cup-to-Disc Ratio; HCDR - Vertical Cup-to-Disc Ratio; VCDR - Vertical Cup-to-Disc Ratio; HRT - Horizontal Rim Thickness; VRT - Vertical Rim Thickness; L - Left Eye; R - Right Eye, LR - Both Eyes.
