# Supplementary material
Source: PubMed Central journal article supplement (PMC3017237)
Supplement: NIHMS232454-supplement-03.pdf [file NIHMS232454-supplement-03.pdf]

Table 4. Area under Receiver Operating Characteristic Curve and Specificity and Sensitivity of Retinal Nerve Fiber Layer Thickness and Optic Nerve Head Topographic Parameters

| Parameter                     | Normals-Glaucoma* |             | Normals-Mild |             | Mild-Moderate |             | Moderate-Severe |             |
|-------------------------------|-------------------|-------------|--------------|-------------|---------------|-------------|-----------------|-------------|
|                               | Specificity       |             | Specificity  |             | AUC           | Specificity | Specificity     |             |
|                               | AUC               | Sensitivity | AUC          | Sensitivity | AUC           | Sensitivity | AUC             | Sensitivity |
| RNFL thickness                |                   |             |              |             |               |             |                 |             |
| 360° average                  | 0.950             | 94.5-84.5   | 0.893        | 91.8-77.4   | 0.726         | 67.7-85.7   | 0.684           | 92.9-42.9   |
| Temporal quadrant             | 0.807             | 89.0-63.2   | 0.766        | 89.0-58.1   | 0.597         | 41.9-85.7   | 0.500           | 71.4-42.9   |
| Superior quadrant             | 0.933             | 84.3-87.7   | 0.859        | 82.2-77.4   | 0.682         | 61.3-78.6   | 0.786           | 85.7-71.4   |
| Nasal quadrant                | 0.739             | 76.7-59.4   | 0.713        | 85.6-48.4   | 0.528         | 45.2-71.4   | 0.564           | 92.9-21.4   |
| Inferior quadrant             | 0.953             | 95.3-86.3   | 0.895        | 87.0-80.6   | 0.790         | 74.2-78.6   | 0.610           | 92.9-32.1   |
| Clock-hr 9R/3L                | 0.490             | 88.2-24.7   | 0.532        | 91.1-32.2   | 0.562         | 32.3-92.9   | 0.538           | 57.1-60.7   |
| Clock-hr 10R/2L               | 0.796             | 78.7-74.0   | 0.719        | 62.2-71.0   | 0.599         | 67.7-64.3   | 0.602           | 57.1-67.9   |
| Clock-hr 11R/1L               | 0.924             | 95.3-79.5   | 0.862        | 88.4-71.0   | 0.657         | 67.7-71.4   | 0.668           | 57.1-82.1   |
| Clock-hr 12RL                 | 0.858             | 70.9-86.3   | 0.776        | 61.6-87.1   | 0.643         | 41.9-85.7   | 0.673           | 50.0-89.3   |
| Clock-hr 1R/11L               | 0.804             | 81.1-72.3   | 0.675        | 82.2-51.6   | 0.638         | 71.0-57.1   | 0.730           | 71.4-78.6   |
| Clock-hr 2R/10L               | 0.847             | 81.1-78.1   | 0.762        | 83.6-64.5   | 0.578         | 32.3-92.9   | 0.640           | 57.1-82.1   |
| Clock-hr 3R/9L                | 0.673             | 85.0-45.2   | 0.665        | 84.2-45.2   | 0.551         | 51.6-71.4   | 0.482           | 57.1-57.1   |
| Clock-hr 4R/8L                | 0.767             | 93.7-54.8   | 0.726        | 95.9-45.2   | 0.684         | 93.5-42.9   | 0.602           | 50.0-82.1   |
| Clock-hr 5R/7L                | 0.850             | 91.3-71.2   | 0.714        | 89.7-51.6   | 0.751         | 93.5-50.0   | 0.518           | 42.9-92.9   |
| Clock-hr 6RL                  | 0.923             | 98.4-71.2   | 0.831        | 78.8-74.2   | 0.744         | 58.1-92.9   | 0.679           | 42.9-92.9   |
| Clock-hr 7R/5L                | 0.957             | 92.9-90.4   | 0.918        | 89.0-83.9   | 0.689         | 80.6-57.1   | 0.536           | 100-17.9    |
| Clock-hr 8R/4L                | 0.668             | 51.2-79.5   | 0.687        | 52.7-77.4   | 0.544         | 87.1-28.6   | 0.515           | 28.6-92.9   |
| ONH topography                |                   |             |              |             |               |             |                 |             |
| Disc area (mm <sup>2</sup> )  | 0.560             | 89.0-24.7   | 0.501        | 82.3-32.3   | 0.689         | 96.8-50.0   | 0.635           | 57.1-82.1   |
| Cup area (mm <sup>2</sup> )   | 0.868             | 86.6-76.7   | 0.787        | 78.8-74.2   | 0.749         | 87.1-57.1   | 0.579           | 50.0-85.7   |
| Rim area (mm <sup>2</sup> )   | 0.962             | 96.9-90.4   | 0.912        | 97.3-77.4   | 0.690         | 71.0-64.3   | 0.686           | 50.0-85.7   |
| CDR                           | 0.930             | 94.5-83.6   | 0.864        | 93.8-71.0   | 0.760         | 77.4-71.4   | 0.561           | 50.0-71.4   |
| HCDR                          | 0.883             | 91.3-75.3   | 0.821        | 80.8-77.4   | 0.691         | 93.5-50.0   | 0.497           | 50.0-67.9   |
| VCDR                          | 0.951             | 94.5-89.0   | 0.890        | 93.8-77.4   | 0.802         | 71.0-85.7   | 0.579           | 64.3-57.1   |
| HRT (µm)                      | 0.901             | 92.9-75.3   | 0.847        | 76.7-83.9   | 0.664         | 87.1-50.0   | 0.566           | 100-21.4    |
| VRT (µm)                      | 0.963             | 94.5-91.8   | 0.914        | 91.8-83.9   | 0.779         | 51.6-92.9   | 0.653           | 57.1-75.0   |
| Cup volume (mm <sup>3</sup> ) | 0.889             | 88.2-80.8   | 0.834        | 82.2-77.4   | 0.710         | 93.5-50.0   | 0.617           | 50.0-89.3   |

\*All glaucomatous eyes; AUC - Area Under Receiver Operating Characteristic Curve; RNFL - Retinal Nerve Fiber Layer; ONH - Optic Nerve Head; L - Left Eye; R - Right Eye; LR - Both Eyes; CDR - Cup-to Disc Ratio; HCDR - Horizontal Cup-to-Disc Ratio; VCDR - Vertical Cup-to-Disc Ratio; HRT - Horizontal Rim Thickness; VRT - Vertical Rim Thickness
