# Supplementary material
Source: PubMed Central journal article supplement (PMC3017237)
Supplement: NIHMS232454-supplement-04.pdf [file NIHMS232454-supplement-04.pdf]

Table 5. Area under Receiver Operating Characteristic Curve Differences (upper triangle of numbers) and P-Values of Differences (lower triangle of numbers - shaded) between the Top Six Parameters for Separating Normal from Glaucomatous Eyes (A) and Normal from Mild Glaucoma (B)

| <b>A</b>      | <b>Clock-hr 7</b> | <b>VRT</b> | <b>Rim area</b> | <b>Inf. quadrant</b> | <b>RNFL</b> | <b>VCDR</b> |
|---------------|-------------------|------------|-----------------|----------------------|-------------|-------------|
| Clock-hour 7  | -                 | 0.0039     | 0.0066          | 0.023                | 0.026       | 0.0285      |
| VRT           | 0.870             | -          | 0.0027          | 0.019                | 0.022       | 0.0245      |
| Rim area      | 0.787             | 0.878      | -               | 0.016                | 0.0199      | 0.022       |
| Inf. quadrant | 0.293             | 0.456      | 0.481           | -                    | 0.0029      | 0.0055      |
| RNFL          | 0.233             | 0.381      | 0.395           | 0.839                | -           | 0.0027      |
| VCDR          | 0.463             | 0.279      | 0.515           | 0.890                | 0.946       | -           |
| <b>B</b>      | <b>Clock-hr 7</b> | <b>VRT</b> | <b>Rim area</b> | <b>Inf. quadrant</b> | <b>RNFL</b> | <b>VCDR</b> |
| Clock-hour 7  | -                 | 0.0051     | 0.0025          | 0.005                | 0.0065      | 0.0082      |
| VRT           | 0.743             | -          | 0.0026          | 0.010                | 0.011       | 0.013       |
| Rim area      | 0.874             | 0.811      | -               | 0.0075               | 0.0091      | 0.010       |
| Inf. quadrant | 0.709             | 0.522      | 0.626           | -                    | 0.0015      | 0.0032      |
| RNFL          | 0.615             | 0.461      | 0.554           | 0.863                | -           | 0.0017      |
| VCDR          | 0.682             | 0.156      | 0.500           | 0.875                | 0.933       | -           |

AUC - Area under Receiver Operating Characteristic Curve. VRT - Vertical Rim Thickness, Inf. - Inferior; RNFL - Retinal Nerve Fiber Layer, VCDR - Vertical Cup-to-Disc Ratio.

No p-value is less than 0.05, indicating that none of the differences in AUC values were significant.
