# Supplementary material
Source: PubMed Central journal article supplement (PMC3017237)
Supplement: NIHMS232454-supplement-05.pdf [file NIHMS232454-supplement-05.pdf]

## APPENDIX

### **Participating Centers and Investigators in the Cirrus OCT Normative Data Collection Group**

*Bascom Palmer Eye Institute, University of Miami Miller School of Medicine, Miami, Florida, USA:* Principal Investigator: Donald L. Budenz, MD, MPH; Coinvestigators: Robert T. Chang, MD; Knight J. O'Rese, MD; Mohamed Gendy, MD.

*New York Eye and Ear Infirmary, New York, New York, USA:* Principal Investigator: Jeffery M. Liebmann, MD.

*The Chinese University of Hong Kong, Department of Ophthalmology and Visual Sciences, Hong Kong, China:* Principal Investigator: Christopher K. Leung, MD, MB, ChB; Coinvestigator: Dennis S. Lam, MD.

*United Medical Research Institute, Inglewood, California, USA:* Principal Investigator: James H. Peace, MD.

*University of Alabama, Department of Ophthalmology, Birmingham, Alabama, USA:* Principal Investigator: Christopher A. Girkin, MD, MSPH.

*University of California Davis, Department of Ophthalmology & Visual Science, Sacramento, California, USA:* Principal Investigator: John S. Werner, PhD; Coinvestigators: John L. Keltner, MD; Esther Kim, MD.

*UPMC Eye Center, University of Pittsburgh School of Medicine, Pittsburgh, Pennsylvania, USA:* Principal Investigator: Gadi Wollstein, MD; Coinvestigators: Joel S. Schuman, MD; Hiroshi Ishikawa, MD; Robert J. Noecker, MD.
